# Supplementary material for: Fancd2-deficient hematopoietic stem and progenitor cells depend on augmented mitochondrial translation for survival and proliferation
Source: PubMed Central journal article supplement — Stem Cell Res. Author manuscript; Available in PMC 2019 Dec 12. (PMC6907690; doi:10.1016/j.scr.2019.101550), 2019-08-23
Supplement: NIHMS1544427-supplement-1.pdf [file NIHMS1544427-supplement-1.pdf]

## Supplemental Information

### ***Fancd2*-deficient hematopoietic stem and progenitor cells depend on augmented mitochondrial translation for survival and proliferation**

Srinivas Chatla, Andrew F. Wilson, Amom Ruhikanta Meetei, Qishen Pang

Supplemental Figure 1

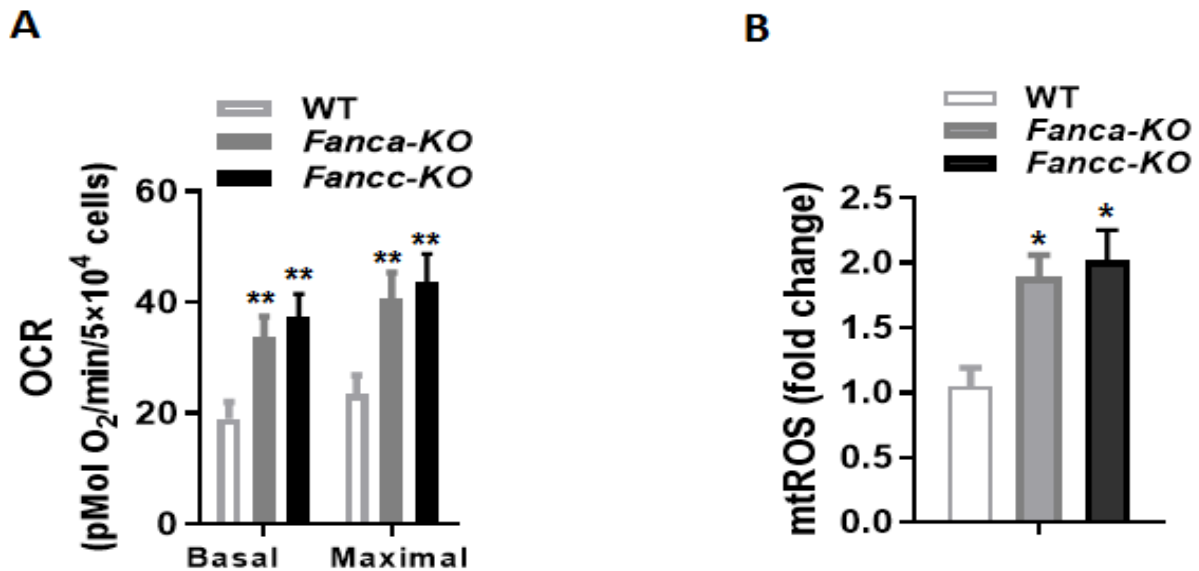

**Supplemental Figure 1. Increased OXPHOS and mtROS in *Fanca-KO* and *Fancc-KO* HSPCs.** (A) Increased mitochondrial respiration in *Fanca-KO* and *Fancc-KO* HSPCs. Oxygen consumption rates (OCR) were measured in BM LSK cells using the Seahorse XF96 analyzer. Basal OCR and Maximal OCR are shown. (B) Increased mitochondrial ROS, measured using mitoSOX, in *Fanca-KO* and *Fancc-KO* LSK cells. Results are presented as mean  $\pm$  SD of three independent experiments. \* $p < 0.05$ , \*\* $p < 0.01$
